# Supplementary material for: The adaptive roles of aneuploidy and polyclonality in Leishmania in response to environmental stress
Source: PubMed Central journal article supplement — EMBO Rep. 2023 Jul 20;24(9):e57413. doi: 10.15252/embr.202357413 (PMC10481652; doi:10.15252/embr.202357413), 2023-07-20
Supplement: EMBR-24-e57413-s001.pdf [file EMBR-24-e57413-s001.pdf]

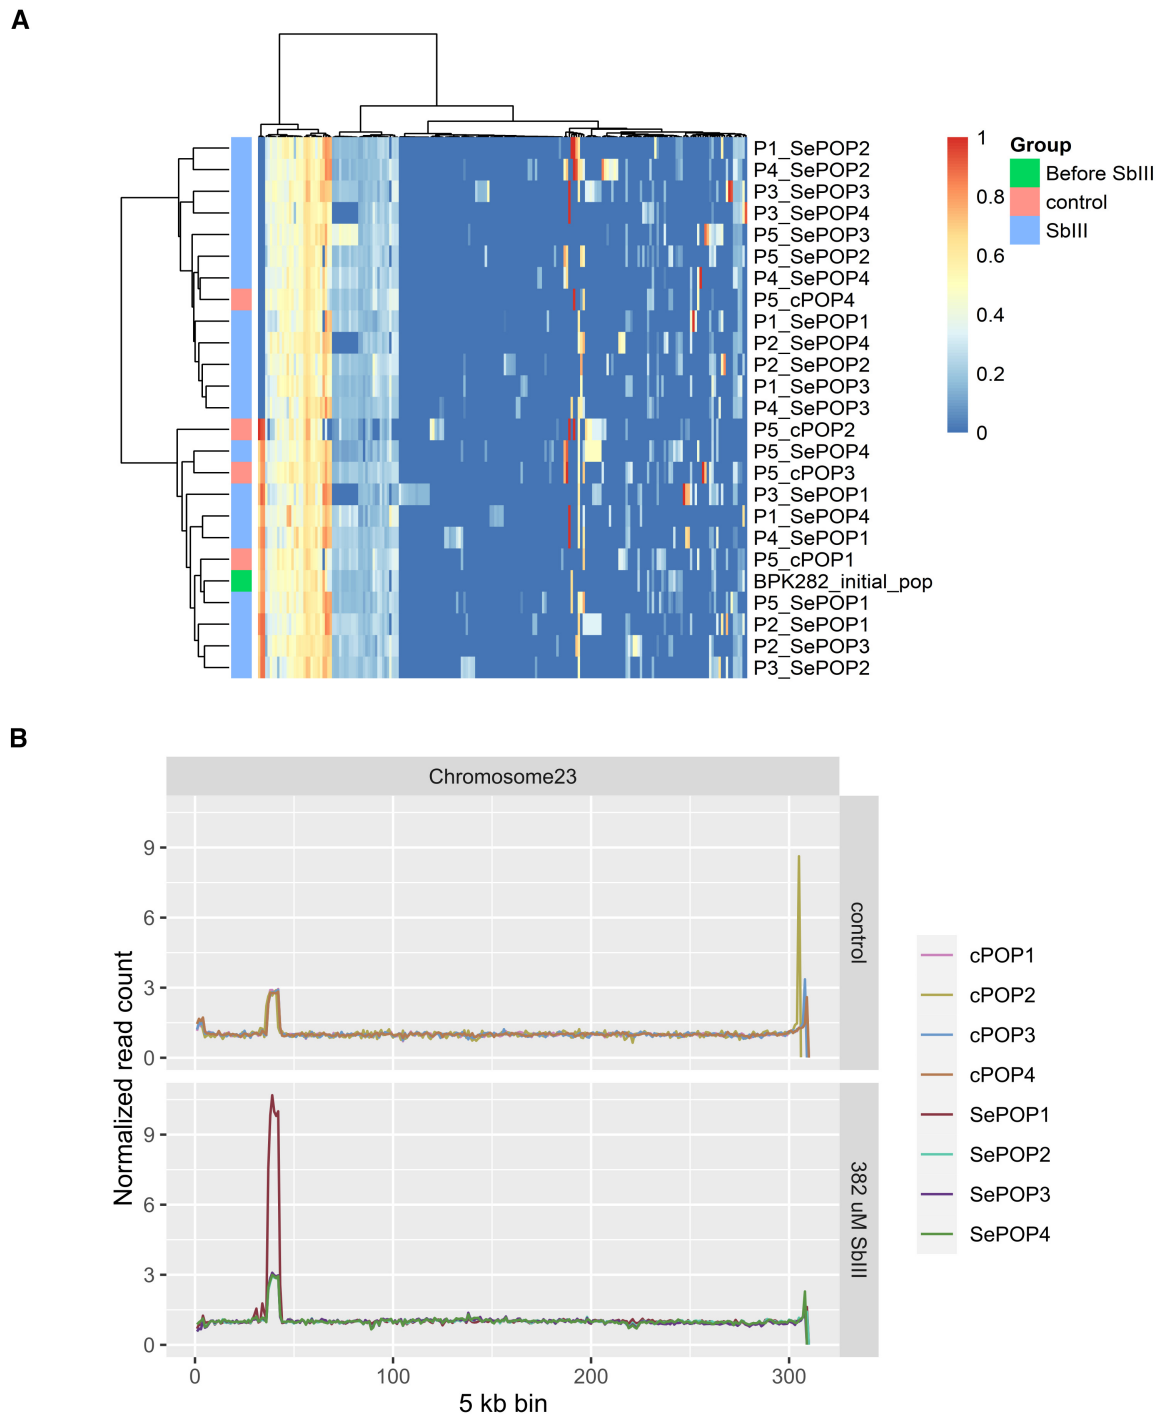

**Figure EV2. Additional genomic changes associated with the  $Sb^{III}$ -Flash selection performed on the barcoded BPK282 population.**

A Heatmap depicting the allele frequencies of SNPs and indels identified in protein coding regions compared to the reference genome. An additional annotation bar display to which group (control or  $Sb^{III}$ -exposed) a sample belongs. Samples are named as Px\_cPOP<sub>y</sub> for controls, and Px\_SePOP<sub>y</sub> for the  $Sb^{III}$ -exposed groups, with x being the number of passages and y being the replicate number. The initial population is named as 'Before  $Sb^{III}$ '.

B Copy number variation in the MRPA locus. The Y axis represents the median read count of 5 kb bins normalized by the median count of chromosome 23 and reflects the average copy number per haploid genome of the MRPA locus.

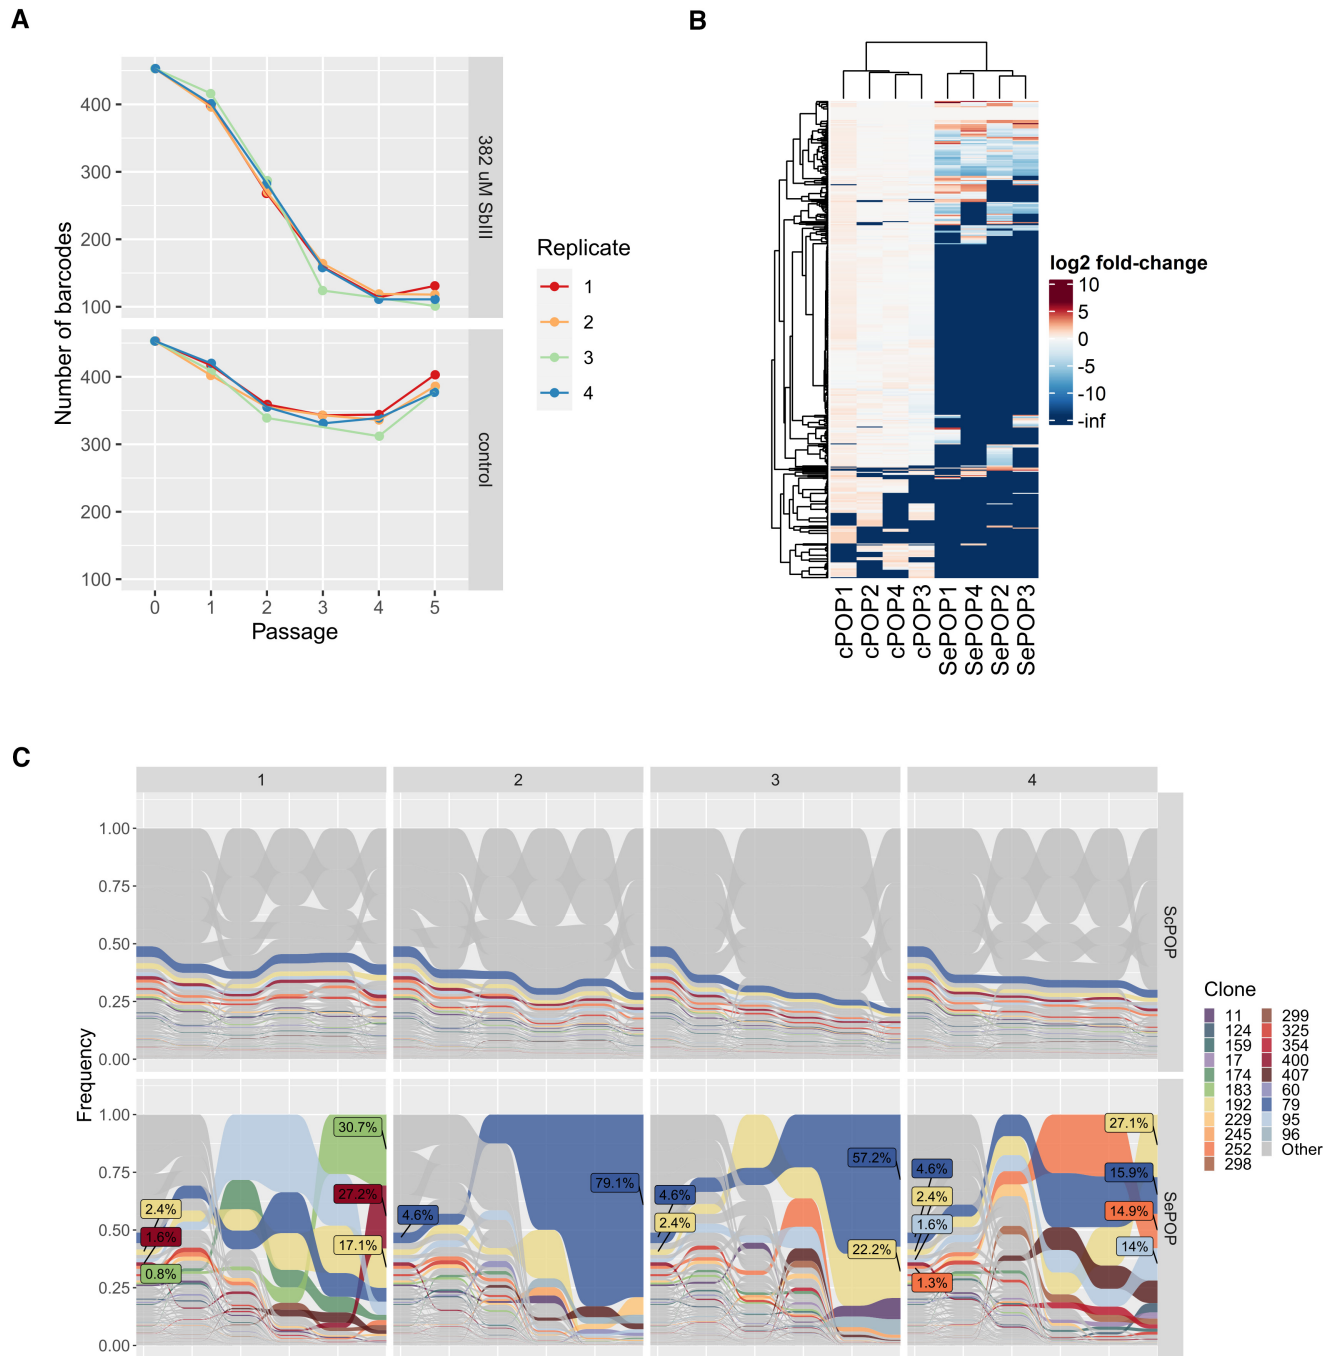

**Figure EV3. Supporting figures for main Fig 2.**

- A Total number of different barcodes identified in each population at each timepoint in the Sb<sup>III</sup>-exposed populations (top) and the controls (bottom).
- B Heatmap displaying the Sb<sup>III</sup>-associated fold-change of each lineage (rows) in each population (columns) at passage 5.
- C Frequency of each barcoded lineage along the 5 passages in the ScPOP1-4 (top) and SePOP1-4 (bottom) populations. This is similar to main Fig 2F but includes the ScPOP1-4 for comparison. Only lineages that reached a frequency higher than 1% at passage 5 in at least one of the SePOP populations are colored.

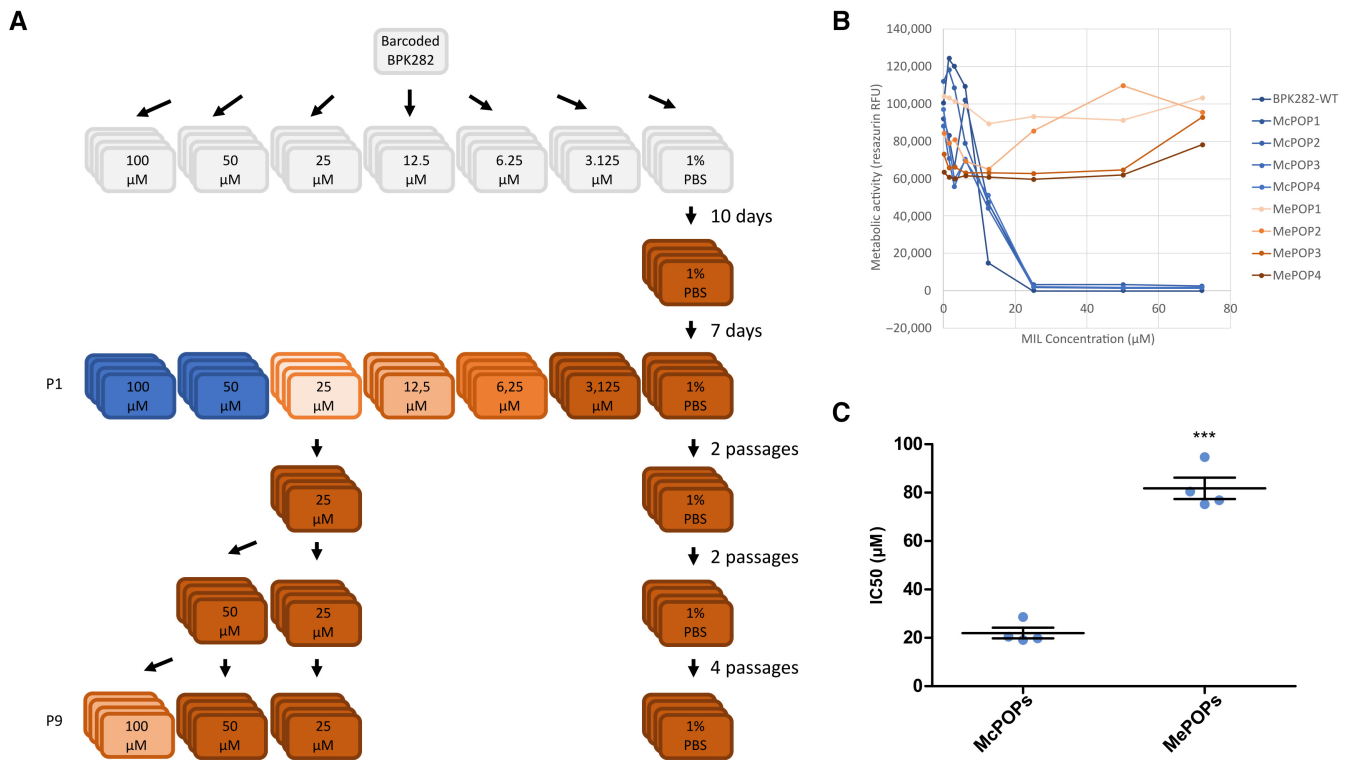

**Figure EV4. Supporting figures for flash selection with miltefosine.**

- A Schematic representing the experimental design. Colors indicate the lack of viable parasites (blue) or the relative observed number of parasites at day 7 compared to the controls (darker brown = more cells).
- B Dose–response to miltefosine of the metabolic activity of the populations at the first passage after exposure to the drug, estimated with the resazurin assay.
- C Difference in IC<sub>50</sub> of the same populations one passage later. \*\*\* $P < 0.001$  ( $t$ -test).
